# Supplementary material for: Machine learning to predict microbial community functions: An analysis of dissolved organic carbon from litter decomposition
Source: PubMed Central journal article supplement (PMC6602172; doi:10.1371/journal.pone.0215502), 2019-07-01
Supplement: pone.0215502.s005.pdf [file pone.0215502.s005.pdf]

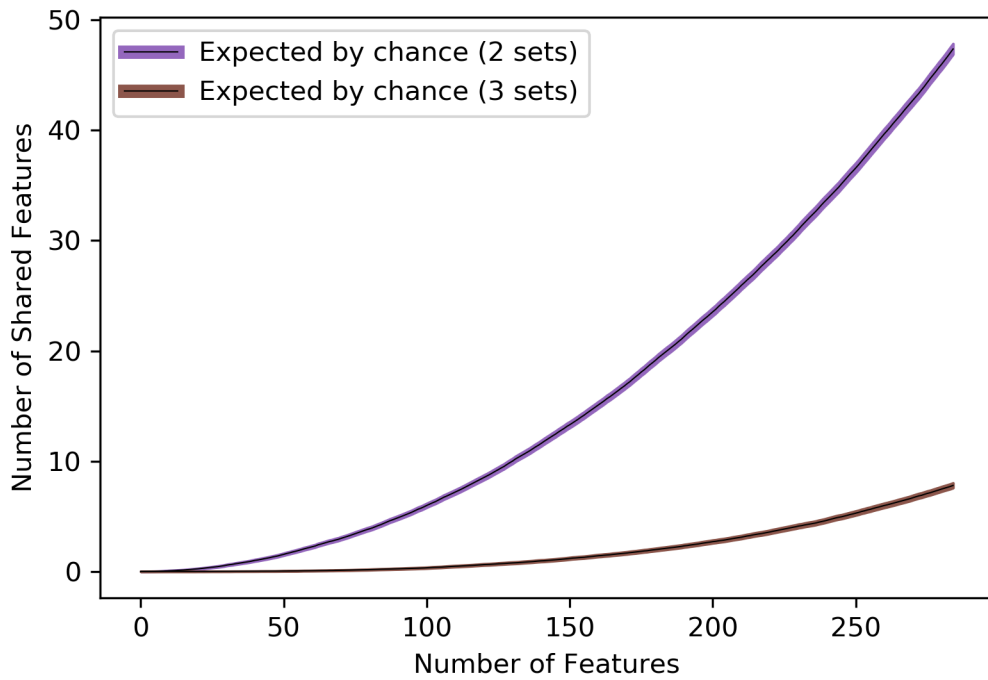

**S4 Fig. Monte Carlo simulation of the expected number of shared features after sampling from randomly organized sets of 1709 features.** Monte Carlo approach samples features from three randomly organized sets of 1709 features to count the number of features commonly selected in a pair of sets (purple) or within the intersection of all three sets (brown). Plotted curves show the mean and 99% confidence interval from 1,000 simulations as a function of the number of sampled features.
